# Supplementary material for: Breakdown mechanisms of whey protein gels during dynamic in vitro gastric digestion
Source: Royal Society of Chemistry journal article supplement (doi:10.1039/d0fo03325a), 2021-01-01
Supplement: d0fo03325a1.pdf [file d0fo03325a1.pdf]

**SUPPLEMENTARY MATERIAL**

**Supplementary Table 1.** Median particle area,  $x_{50}$ , change (% from initial) and number of particles per gram of solid phase of digesta for small cubes, medium cubes, spheres, and large cubes. Values represent the average ( $n = 3$ )  $\pm$  standard error of the mean. Different letters within each column (abc) and within each row (zyx) are means significantly different within the row or column ( $p < 0.05$ ). Values with no letters within each row or column show no significant differences between means.

| Digestion Time<br>(min) | Median Particle Area Change (% from initial) |                                 |                                  |                               |
|-------------------------|----------------------------------------------|---------------------------------|----------------------------------|-------------------------------|
|                         | Small                                        | Medium                          | Spheres                          | Large                         |
| 30                      | 87.7 $\pm$ 4.3 <sup>a</sup>                  | 80.6 $\pm$ 11.2 <sup>a</sup>    | 77.5 $\pm$ 9.0 <sup>a</sup>      | 97.2 $\pm$ 0.6 <sup>a</sup>   |
| 60                      | 18.0 $\pm$ 13.3 <sup>b,y</sup>               | 33.6 $\pm$ 12.0 <sup>b,zy</sup> | 37.0 $\pm$ 13.1 <sup>ab,zy</sup> | 77.9 $\pm$ 6.0 <sup>a,z</sup> |
| 75                      | 22.0 $\pm$ 8.2 <sup>b,y</sup>                | 6.0 $\pm$ 14.7 <sup>b,y</sup>   | 3.2 $\pm$ 2.9 <sup>b,y</sup>     | 77.1 $\pm$ 5.3 <sup>a,z</sup> |
| 90                      | 32.3 $\pm$ 12.7 <sup>b</sup>                 | 14.8 $\pm$ 19.4 <sup>b</sup>    | 8.9 $\pm$ 3.4 <sup>b</sup>       | 30.7 $\pm$ 9.5 <sup>b</sup>   |
| 105                     | 5.3 $\pm$ 6.6 <sup>b</sup>                   | 19.9 $\pm$ 22.0 <sup>b</sup>    | 12.4 $\pm$ 0.2 <sup>b</sup>      | 20.3 $\pm$ 20.2 <sup>b</sup>  |
| 120                     | 3.3 $\pm$ 6.9 <sup>b</sup>                   | 6.9 $\pm$ 7.8 <sup>b</sup>      | 13.0 $\pm$ 2.0 <sup>b</sup>      | 4.9 $\pm$ 9.5 <sup>b</sup>    |
| 150                     | 9.7 $\pm$ 0.4 <sup>b</sup>                   | 9.1 $\pm$ 5.8 <sup>b</sup>      | 13.6 $\pm$ 1.1 <sup>b</sup>      | 8.6 $\pm$ 14.9 <sup>b</sup>   |
| 180                     | 17.7 $\pm$ 3.0 <sup>b</sup>                  | 10.3 $\pm$ 11.6 <sup>b</sup>    | 19.1 $\pm$ 1.2 <sup>b</sup>      | 14.1 $\pm$ 10.0 <sup>b</sup>  |

  

| Digestion Time<br>(min) | Number of Particles per Gram      |                                |                                |                                  |
|-------------------------|-----------------------------------|--------------------------------|--------------------------------|----------------------------------|
|                         | Small                             | Medium                         | Spheres                        | Large                            |
| 0                       | 16.3 $\pm$ 1.4 <sup>b</sup>       | 7.0 $\pm$ 0.3 <sup>b</sup>     | 5.8 $\pm$ 0.1                  | 1.0 $\pm$ 0.1 <sup>b</sup>       |
| 30                      | 1802.7 $\pm$ 434.4 <sup>a,z</sup> | 796 $\pm$ 276.8 <sup>a,y</sup> | 364.8 $\pm$ 166.8 <sup>y</sup> | 789.2 $\pm$ 101.2 <sup>a,y</sup> |
| 60                      | 174.5 $\pm$ 4.2 <sup>b</sup>      | 84.9 $\pm$ 9.4 <sup>b</sup>    | 88.0 $\pm$ 52.9                | 108.8 $\pm$ 35.7 <sup>b</sup>    |
| 75                      | 111.8 $\pm$ 20.7 <sup>b</sup>     | 67.6 $\pm$ 21.0 <sup>b</sup>   | 34.7 $\pm$ 17.2                | 43.1 $\pm$ 2.4 <sup>b</sup>      |
| 90                      | 181.7 $\pm$ 49.5 <sup>b</sup>     | 100 $\pm$ 17.7 <sup>b</sup>    | 23.5 $\pm$ 7.5                 | 15.8 $\pm$ 0.8 <sup>b</sup>      |
| 105                     | 61.3 $\pm$ 1.0 <sup>b</sup>       | 124.1 $\pm$ 23.4 <sup>b</sup>  | 20.6 $\pm$ 4.0                 | 25.3 $\pm$ 13.8 <sup>b</sup>     |
| 120                     | 28.2 $\pm$ 3.2 <sup>b</sup>       | 65.4 $\pm$ 25.6 <sup>b</sup>   | 17.9 $\pm$ 2.3                 | 9.1 $\pm$ 1.9 <sup>b</sup>       |
| 150                     | 35.6 $\pm$ 6.3 <sup>b</sup>       | 45.0 $\pm$ 12 <sup>b</sup>     | 20.7 $\pm$ 8.5                 | 6.7 $\pm$ 2.1 <sup>b</sup>       |
| 180                     | 34.1 $\pm$ 4.0 <sup>b</sup>       | 35.4 $\pm$ 7.0 <sup>b</sup>    | 11.5 $\pm$ 1.2                 | 10.0 $\pm$ 1.8 <sup>b</sup>      |

Note: the median particle area in the emptied digesta over time was calculated using the following equation:

$$\text{median particle area } (x_{50}) \text{ change} = \frac{x_{50t} - x_{50\text{initial}}}{x_{50\text{initial}}}$$

where  $x_{50t}$  is the  $x_{50}$  measured at each digestion time point and  $x_{50\text{initial}}$  is the initial  $x_{50}$  of each geometry.

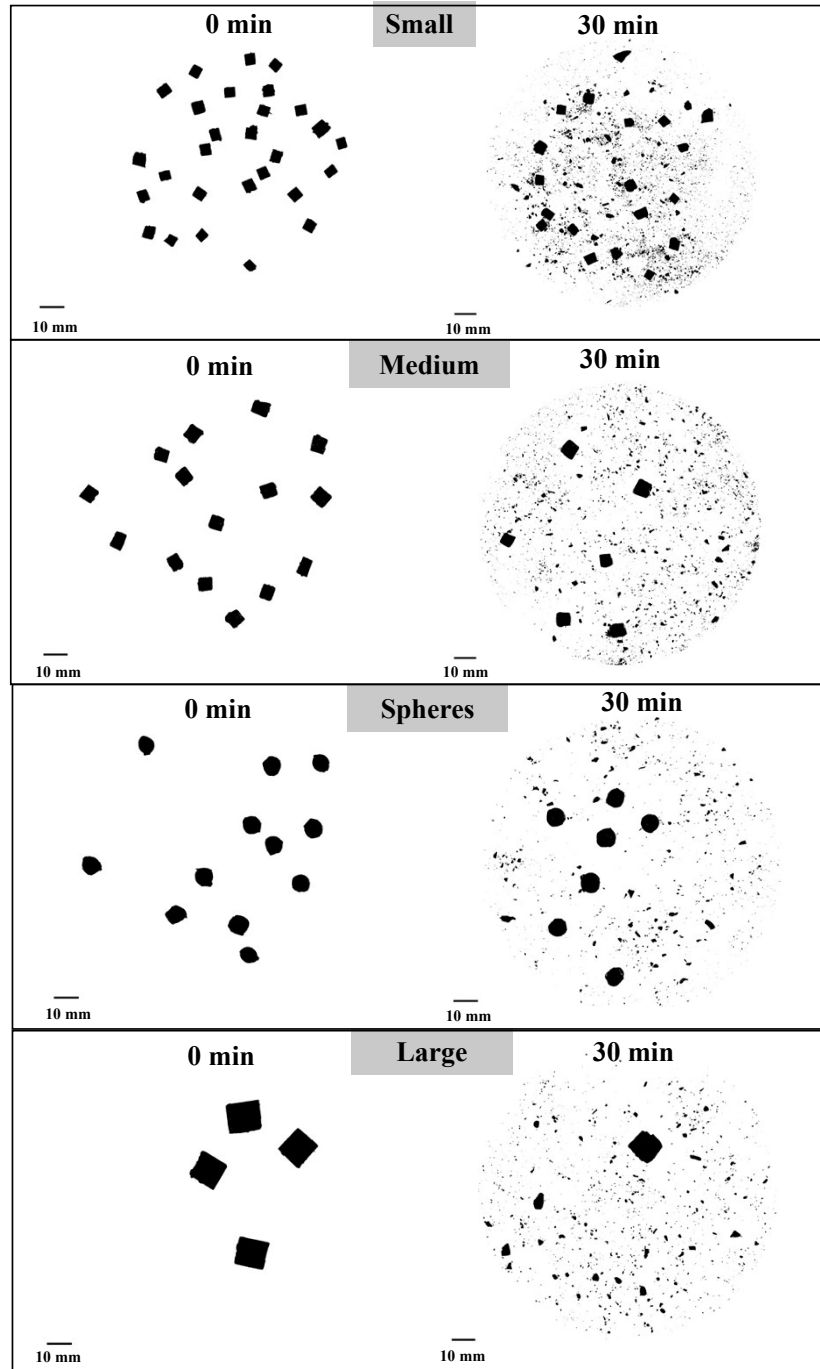

**Supplementary Fig. 1** Examples of binary images used for particle size determination of protein gels before and after 30 min of simulated digestion for each of the four geometries.

**Supplementary Table 2.** Particle size distribution parameters (d10, d50, d90, and specific surface area) from the liquid phase of the emptied digesta of all treatments. Values represent the average ( $n = 2$  or  $3$ )  $\pm$  standard error of the mean.

| <b>Digestion time (min)</b> | <b>d10 (μm)</b>                                 |                     |                |                    |
|-----------------------------|-------------------------------------------------|---------------------|----------------|--------------------|
|                             | <b>Small cubes</b>                              | <b>Medium cubes</b> | <b>Spheres</b> | <b>Large cubes</b> |
| 60                          | 4.5 ± 0.7                                       | 3.6 ± 0.4           | 3.7 ± 0.3      | 3.6 ± 0.1          |
| 75                          | N.D.*                                           | 2.9 ± 0             | 2.7 ± 0.1      | 3.5 ± 0.1          |
| 90                          | 3.5 ± 0.7                                       | 2.6 ± 0.4           | 3 ± 0.4        | 3.2 ± 0.1          |
| 105                         | 3.2 ± 0.4                                       | 2.8 ± 0.2           | 3.1 ± 0        | 3 ± 0.2            |
| 120                         | 3.4 ± 0.3                                       | 2.9 ± 0.2           | 2.6 ± 0.1      | 3 ± 0.2            |
| 150                         | 3.9 ± 0.4                                       | 2.7 ± 0.3           | 2.6 ± 0.1      | 3.1 ± 0.1          |
| 180                         | 4.3 ± 0.7                                       | 2.8 ± 0.2           | 2.5 ± 0.1      | N.D.*              |
| <b>Digestion time (min)</b> | <b>d50 (μm)</b>                                 |                     |                |                    |
|                             | <b>Small cubes</b>                              | <b>Medium cubes</b> | <b>Spheres</b> | <b>Large cubes</b> |
| 60                          | 8.3 ± 1.4                                       | 6.7 ± 0.7           | 6.9 ± 0.4      | 6.7 ± 0.1          |
| 75                          | N.D.*                                           | 5.8 ± 0             | 5.3 ± 0.2      | 6.5 ± 0.2          |
| 90                          | 6.5 ± 1.3                                       | 4.7 ± 0.7           | 6.9 ± 1.6      | 6.3 ± 0            |
| 105                         | 6.1 ± 0.6                                       | 5.3 ± 0.3           | 8.6 ± 0.1      | 6.6 ± 0            |
| 120                         | 6.4 ± 0.7                                       | 6.6 ± 1.3           | 5.8 ± 0.4      | 6.4 ± 0.1          |
| 150                         | 7.4 ± 1.1                                       | 7.9 ± 1.8           | 6.7 ± 0.8      | 7.4 ± 1.2          |
| 180                         | 8.3 ± 2                                         | 8.8 ± 3.1           | 6.4 ± 0.8      | N.D.*              |
| <b>Digestion time (min)</b> | <b>d90 (μm)</b>                                 |                     |                |                    |
|                             | <b>Small cubes</b>                              | <b>Medium cubes</b> | <b>Spheres</b> | <b>Large cubes</b> |
| 60                          | 17.3 ± 2                                        | 13.4 ± 2.7          | 19.9 ± 4.2     | 16.3 ± 2.4         |
| 75                          | N.D.*                                           | 13.4 ± 0.6          | 10.4 ± 0.9     | 19.7 ± 7.5         |
| 90                          | 12.8 ± 3.2                                      | 12.4 ± 3.6          | 24.2 ± 5.8     | 28.5 ± 14.6        |
| 105                         | 20 ± 7.9                                        | 9.7 ± 0.9           | 62.7 ± 29.7    | 57.9 ± 6.7         |
| 120                         | 12.7 ± 2.8                                      | 39.3 ± 28.7         | 16.0 ± 4.3     | 42.2 ± 27.2        |
| 150                         | 18.3 ± 6.7                                      | 46.1 ± 18.8         | 33.6 ± 17.2    | 54 ± 40.1          |
| 180                         | 24.1 ± 12.5                                     | 40.4 ± 23.5         | 18.8 ± 2.7     | N.D.*              |
| <b>Digestion time (min)</b> | <b>Specific Surface Area (mm<sup>2</sup>/g)</b> |                     |                |                    |
|                             | <b>Small cubes</b>                              | <b>Medium cubes</b> | <b>Spheres</b> | <b>Large cubes</b> |
| 60                          | 789 ± 123                                       | 985 ± 119           | 949 ± 46       | 955 ± 16           |
| 75                          | N.D.*                                           | 1133 ± 10           | 1272 ± 63      | 999 ± 42           |
| 90                          | 1037 ± 213                                      | 1413 ± 176          | 1090 ± 171     | 1035 ± 11          |
| 105                         | 1088 ± 108                                      | 1255 ± 90           | 892 ± 11       | 991 ± 21           |
| 120                         | 1053 ± 108                                      | 1091 ± 170          | 1199 ± 47      | 1029 ± 17          |
| 150                         | 902 ± 115                                       | 1078 ± 70           | 1107 ± 105     | 970 ± 77           |
| 180                         | 818 ± 194                                       | 1029 ± 162          | 1246 ± 82      | N.D.*              |

\*N.D. = values not determined since only one replicate was completed due to (1) did not reach obscuration of >5% (for small 75 min), or (2) two of the replicates behaved as outliers (large, 180 min).

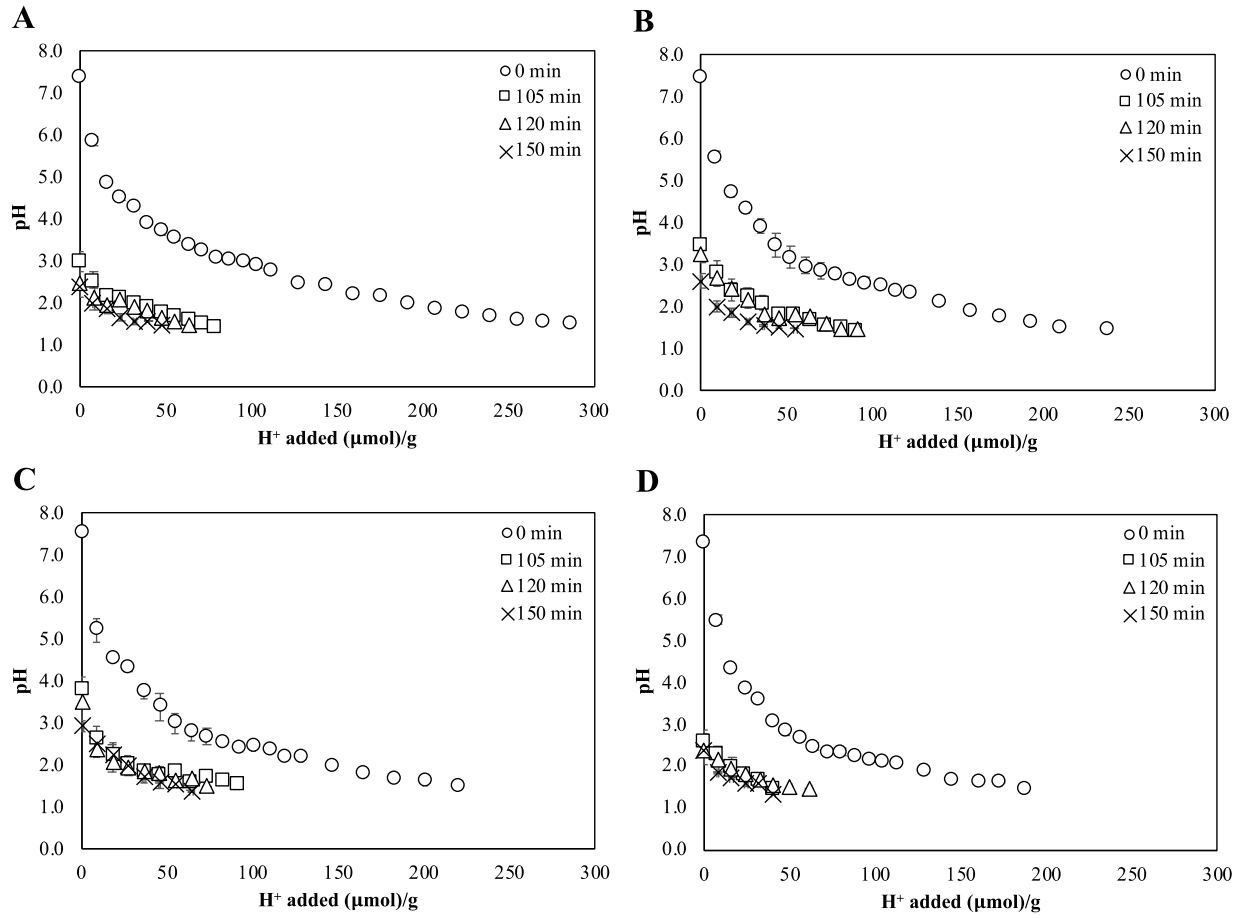

**Supplementary Fig. 2** Acid titration curve of small cubes (A), medium cubes (B), spheres (C), and large cubes (D) before digestion (time 0 min) and after 105, 120, and 150 min of gastric digestion. Different symbols represent averages ( $n = 3$ ) and error bars the standard error of the mean. Error bars are included in all treatments but may be too small to be seen in some treatments.

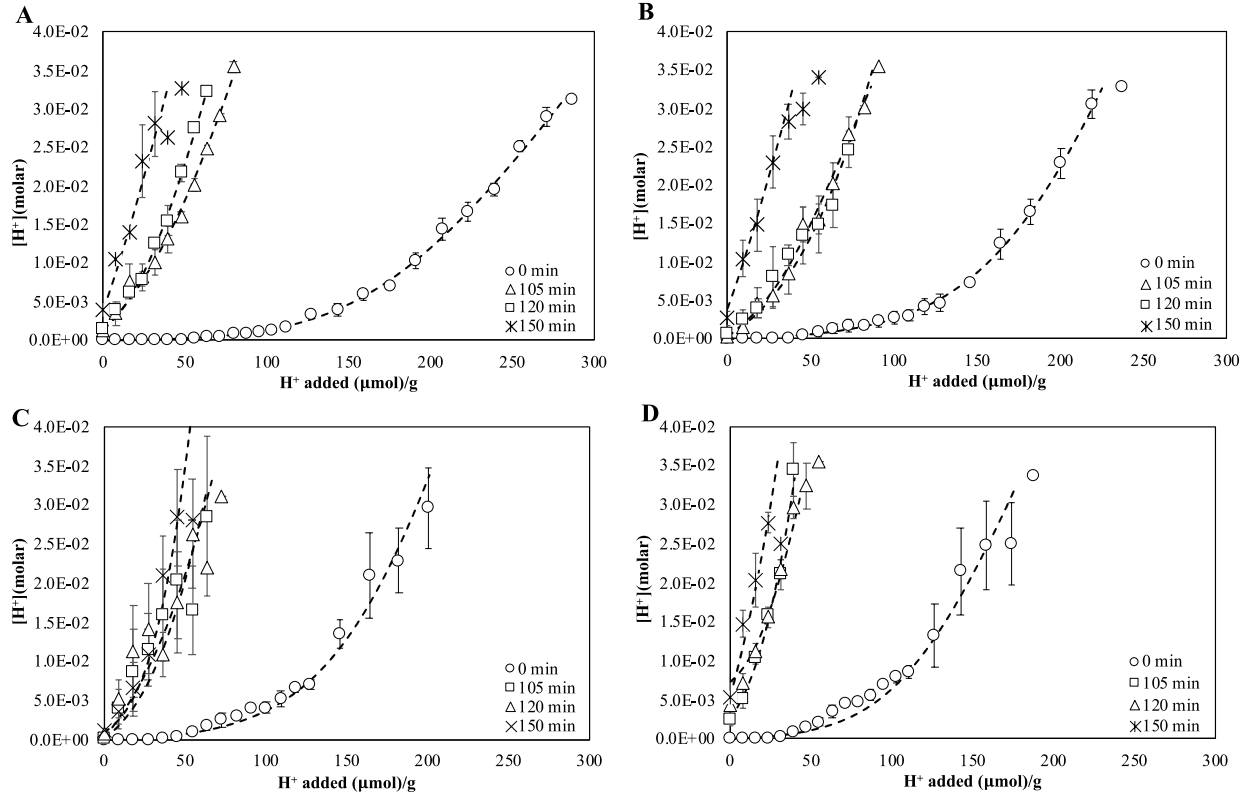

**Supplementary Fig. 3** Exponential growth model plots and measured values from buffering capacity analysis of small cubes (A), medium cubes (B), spheres (C), and large cubes (D) before digestion (time 0 min) and after 105, 120, and 150 min of gastric digestion. Symbols represent averages ( $n = 3$ ) and error bars the standard error of the mean. Dashed lines represent the predicted curves from the empirical model (eqn (4)).
